# Supplementary material for: Phytochemical Characterization for Quality Control of Phyllostachys pubescens Leaves Using High-Performance Liquid Chromatography Coupled with Diode Array Detector and Tandem Mass Detector
Source: MDPI journal article supplement (doi:10.3390/plants11010050), 2021-12-24
Supplement: s1 [file s1]

**Table S1**

Chromatographic parameters for simultaneous analysis of five marker components in *P. pubescens* leaves by HPLC

| Chromatographic parameter |                                                                  |       |       |
|---------------------------|------------------------------------------------------------------|-------|-------|
| Column                    | Gemini C <sub>18</sub> analytical column (250 mm × 4.6 mm, 5 μm) |       |       |
| Detector                  | DAD (310, 325, 335, and 350 nm)                                  |       |       |
| Flow rate                 | 1.0 mL/min                                                       |       |       |
| Injection volume          | 10.0 μL                                                          |       |       |
| Column temperature        | 40.0 °C                                                          |       |       |
| Mobile phase              | A: 0.1% (v/v) aqueous formic acid                                |       |       |
|                           | B: 0.1% (v/v) formic acid in acetonitrile                        |       |       |
| Gradient elution          | Time (min)                                                       | A (%) | B (%) |
|                           | 0                                                                | 95    | 5     |
|                           | 25                                                               | 40    | 60    |
|                           | 30                                                               | 60    | 60    |
|                           | 35                                                               | 95    | 5     |
|                           | 45                                                               | 95    | 5     |

DAD; diode array detector

**Table S2**

System suitability for HPLC analysis of the five marker components

| Compound                | $k'$ | $\alpha$ | $N$    | $R_s$ | $T_f$ |
|-------------------------|------|----------|--------|-------|-------|
| Chlorogenic acid        | 2.94 | 1.19     | 399752 | 14.09 | 1.08  |
| Isoorientin             | 3.50 | 1.19     | 650618 | 3.46  | 1.10  |
| Orientin                | 3.63 | 1.04     | 633528 | 3.46  | 1.08  |
| Isovitexin              | 3.95 | 1.03     | 722500 | 2.62  | 1.06  |
| <i>p</i> -Coumaric acid | 4.06 | 1.03     | 529916 | 2.62  | 1.05  |

$k'$ ; capacity factor,  $\alpha$ ; relative retention,  $N$ ; theoretical plate number,  $R_s$ ; resolution, and  $T_f$ ; tailing factor

**Table S3**Repeatability of retention time of the five marker analytes using HPLC ( $n = 6$ )

| No.     | Retention time (min) |             |          |            |                         |
|---------|----------------------|-------------|----------|------------|-------------------------|
|         | Chlorogenic acid     | Isoorientin | Orientin | Isovitexin | <i>p</i> -Coumaric acid |
| 1       | 12.23                | 13.91       | 14.33    | 15.29      | 15.65                   |
| 2       | 12.24                | 13.92       | 14.34    | 15.31      | 15.66                   |
| 3       | 12.24                | 13.92       | 14.34    | 15.31      | 15.66                   |
| 4       | 12.24                | 13.92       | 14.34    | 15.30      | 15.66                   |
| 5       | 12.24                | 13.92       | 14.34    | 15.31      | 15.66                   |
| 6       | 12.25                | 13.93       | 14.34    | 15.31      | 15.66                   |
| Mean    | 12.24                | 13.92       | 14.34    | 15.30      | 15.66                   |
| SD      | 0.01                 | 0.01        | 0.01     | 0.01       | 0.01                    |
| RSD (%) | 0.06                 | 0.04        | 0.04     | 0.04       | 0.04                    |

**Table S4**Repeatability of peak area of the five marker analytes using HPLC ( $n = 6$ )

| No.     | Peak area        |              |              |              |                         |
|---------|------------------|--------------|--------------|--------------|-------------------------|
|         | Chlorogenic acid | Isoorientin  | Orientin     | Isovitexin   | <i>p</i> -Coumaric acid |
| 1       | 1,770,950        | 1,506,998    | 1,292,847    | 1,423,144    | 1,897,993               |
| 2       | 1,767,368        | 1,502,200    | 1,288,098    | 1,418,291    | 1,890,987               |
| 3       | 1,794,637        | 1,525,428    | 1,306,379    | 1,438,257    | 1,918,884               |
| 4       | 1,768,468        | 1,505,733    | 1,287,574    | 1,419,711    | 1,893,611               |
| 5       | 1,780,640        | 1,519,401    | 1,298,785    | 1,432,187    | 1,909,363               |
| 6       | 1,791,903        | 1,528,323    | 1,309,987    | 1,443,697    | 1,924,334               |
| Mean    | 1,778,994.33     | 1,514,680.50 | 1,297,278.33 | 1,429,214.50 | 1,905,862.00            |
| SD      | 12,039.28        | 11,124.31    | 9430.71      | 10,457.87    | 13,829.81               |
| RSD (%) | 0.68             | 0.73         | 0.73         | 0.73         | 0.73                    |

**Table S5**LC–MS/MS MRM analysis conditions for quantification of markers in *P. pubescens* leaves

| UPLC conditions  |                                                                     | MS conditions        |                                      |
|------------------|---------------------------------------------------------------------|----------------------|--------------------------------------|
| UPLC system      | Acquity UPLC I-Class                                                | MS system            | Xevo TQ-XS                           |
| Column           | Acquity UPLC BEH C <sub>18</sub> column (2.1 mm × 100 mm, 1.7 μm)   | MS software          | MassLynx v4.2                        |
| Column temp.     | 45 °C                                                               | Ion source           | ESI <sup>+</sup> or ESI <sup>-</sup> |
| Sample temp.     | 5 °C                                                                | Acquisition mode     | MRM                                  |
| Injection volume | 2.0 μL                                                              | Capillary voltage    | 3.0 kV                               |
| Flow rate        | 0.3 mL/min                                                          | Cone gas flow        | 50 L/h                               |
| Mobile phase A   | 0.1% (v/v) formic acid and 5 mM ammonium formate in distilled water | Desolvation gas flow | 700 L/h                              |
| Mobile phase B   | Acetonitrile                                                        | Desolvation temp.    | 500 °C                               |
| Gradient         | Time (min)                                                          | A (%)                | B (%)                                |
|                  | Initial                                                             | 100                  | 0                                    |
|                  | 23                                                                  | 85                   | 15                                   |
|                  | 23.1                                                                | 5                    | 95                                   |
|                  | 24.9                                                                | 5                    | 95                                   |
|                  | 25.0                                                                | 100                  | 0                                    |
|                  | 28.0                                                                | 100                  | 0                                    |

ESI; electrospray ionization, MRM; multiple reaction monitoring

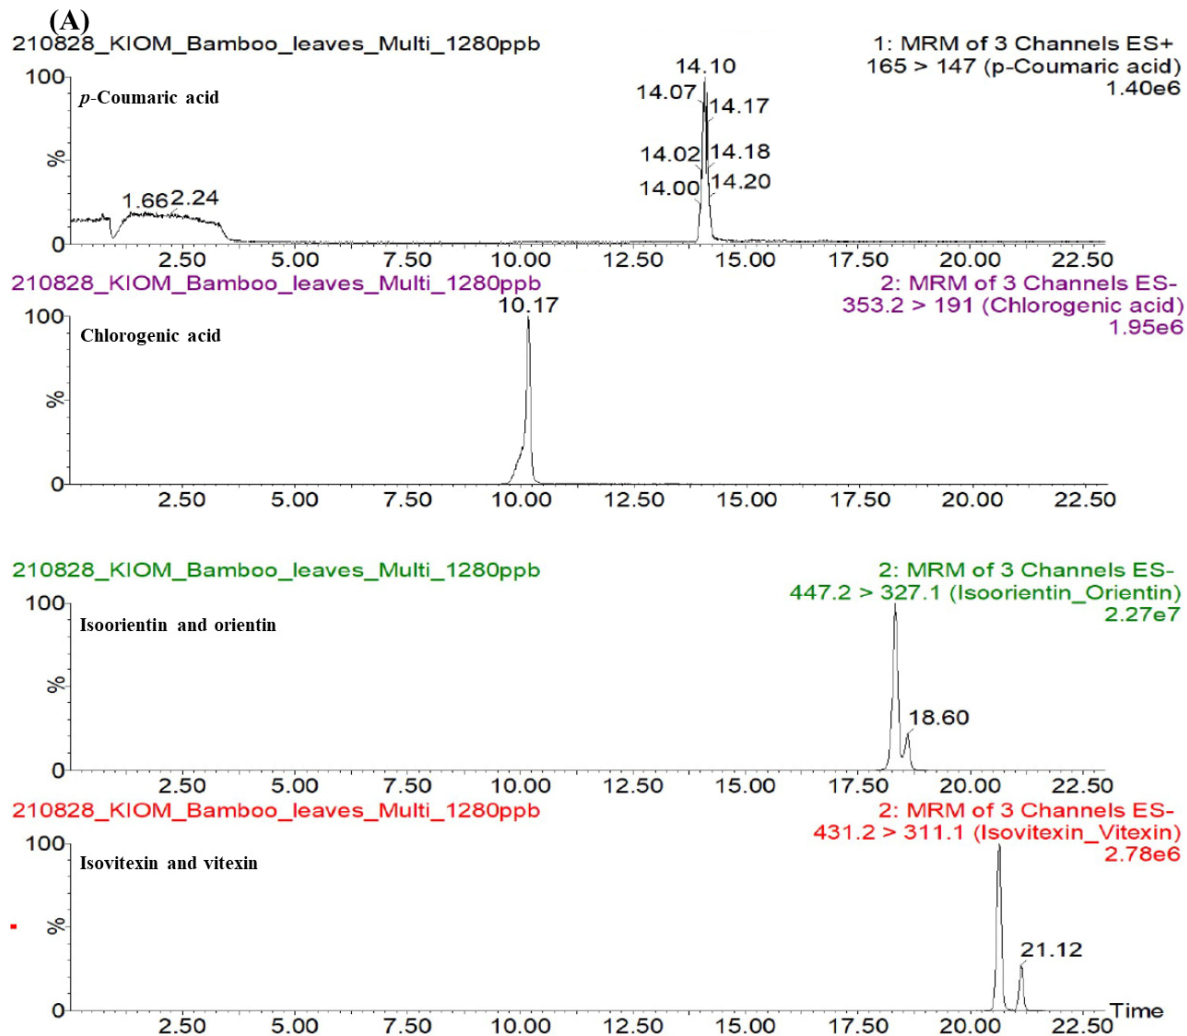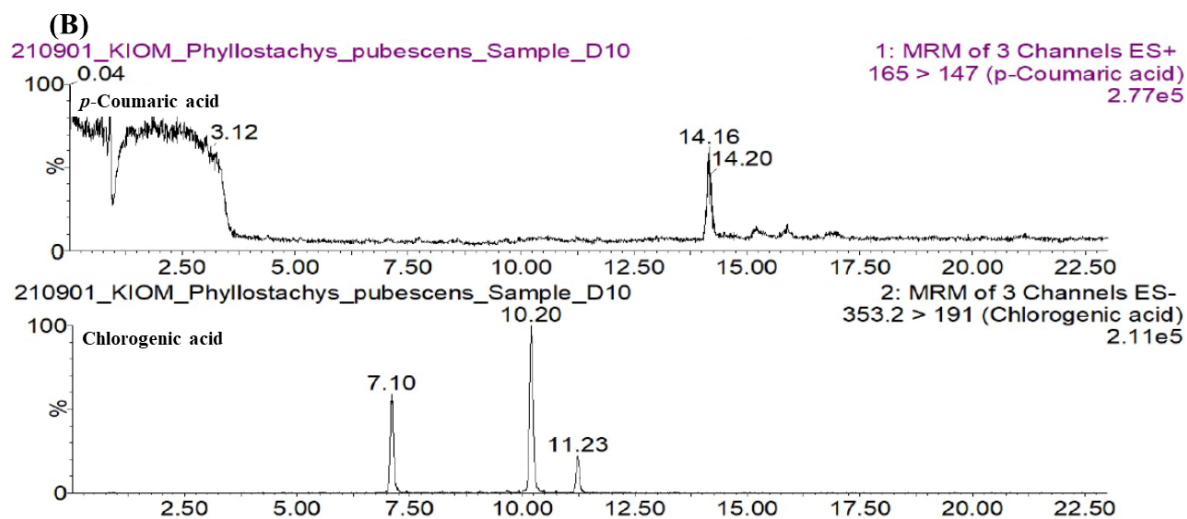

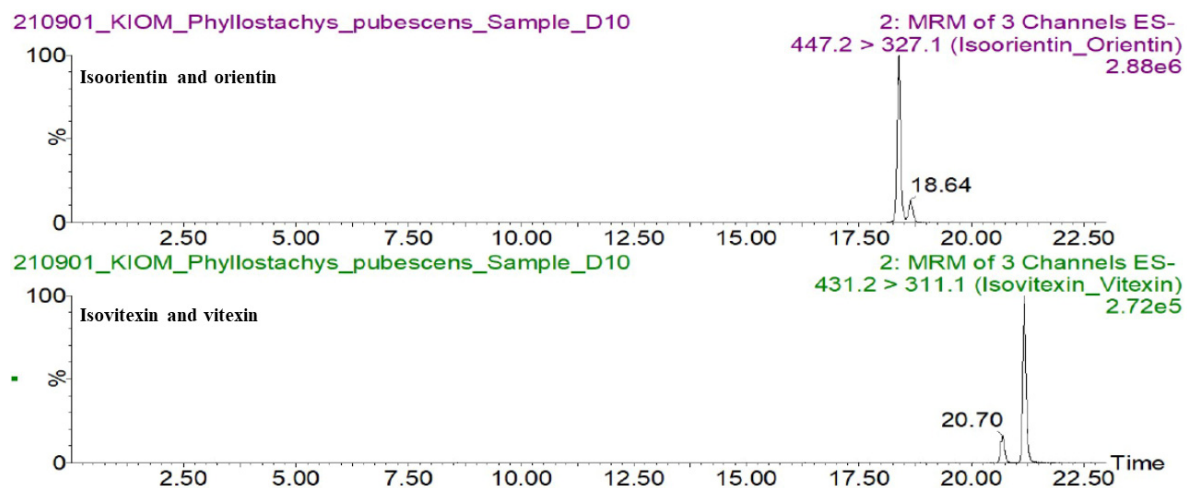

**Figure S1.** Extracted ion chromatograms of each standard marker (A) and marker compound in 80% ethanol extract of the microwave-dried *P. pubescens* leaves sample (B) measured by LC-MS/MS MRM mode.

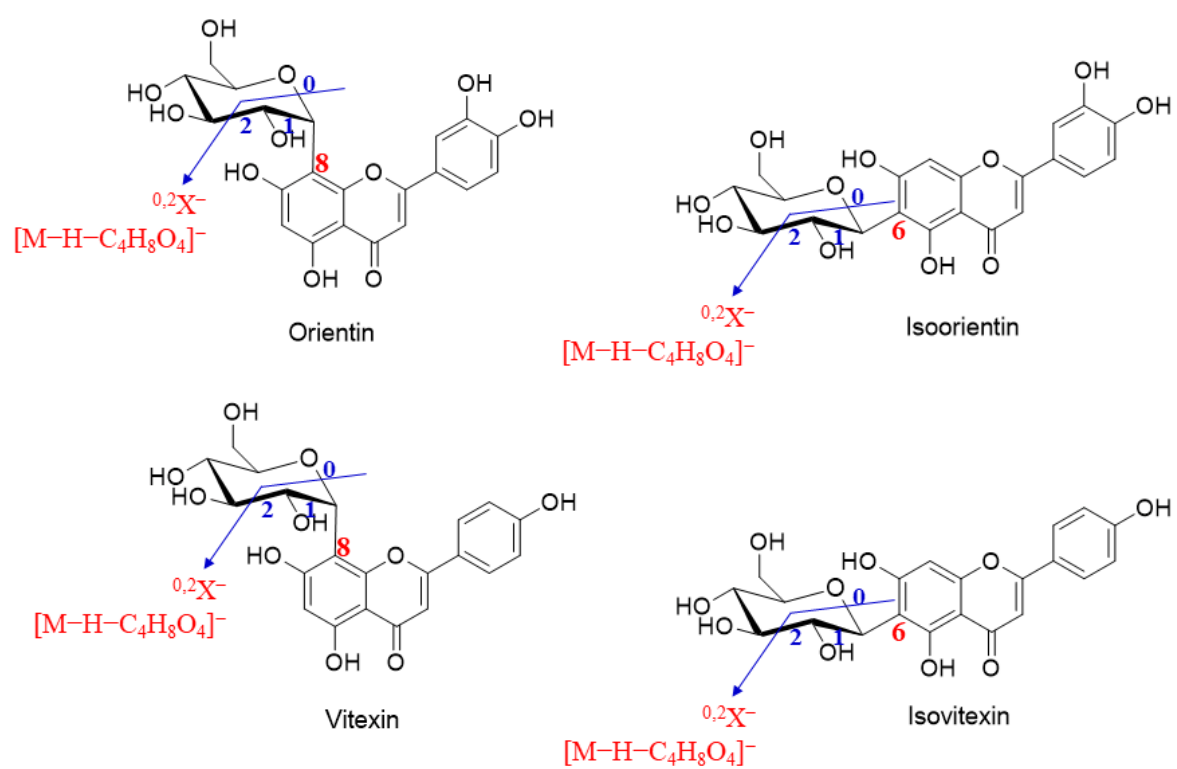

**Figure S2.** Fragmentation of the C-glycosides



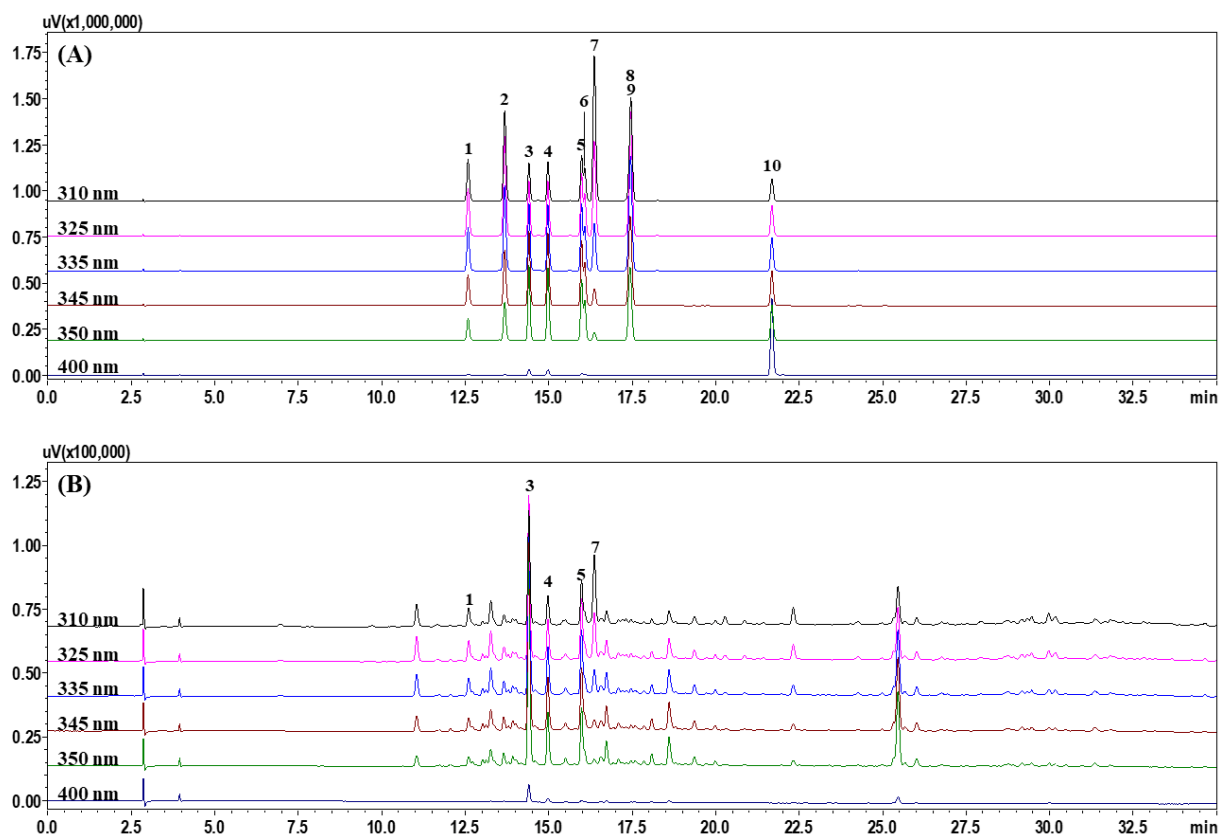

**Figure S3.** Chromatogram standard solution (A), *P. pubescens* leaves sample (B) for selecting marker components of *P. pubescens* leaves by HPLC–DAD analysis system. Chlorogenic acid (1), caffeic acid (2), isoorientin (3), orientin (4), isovitexin (5), vitexin (6), *p*-coumaric acid (7), ferulic acid (8), scopoletin (9), and triclin (10).

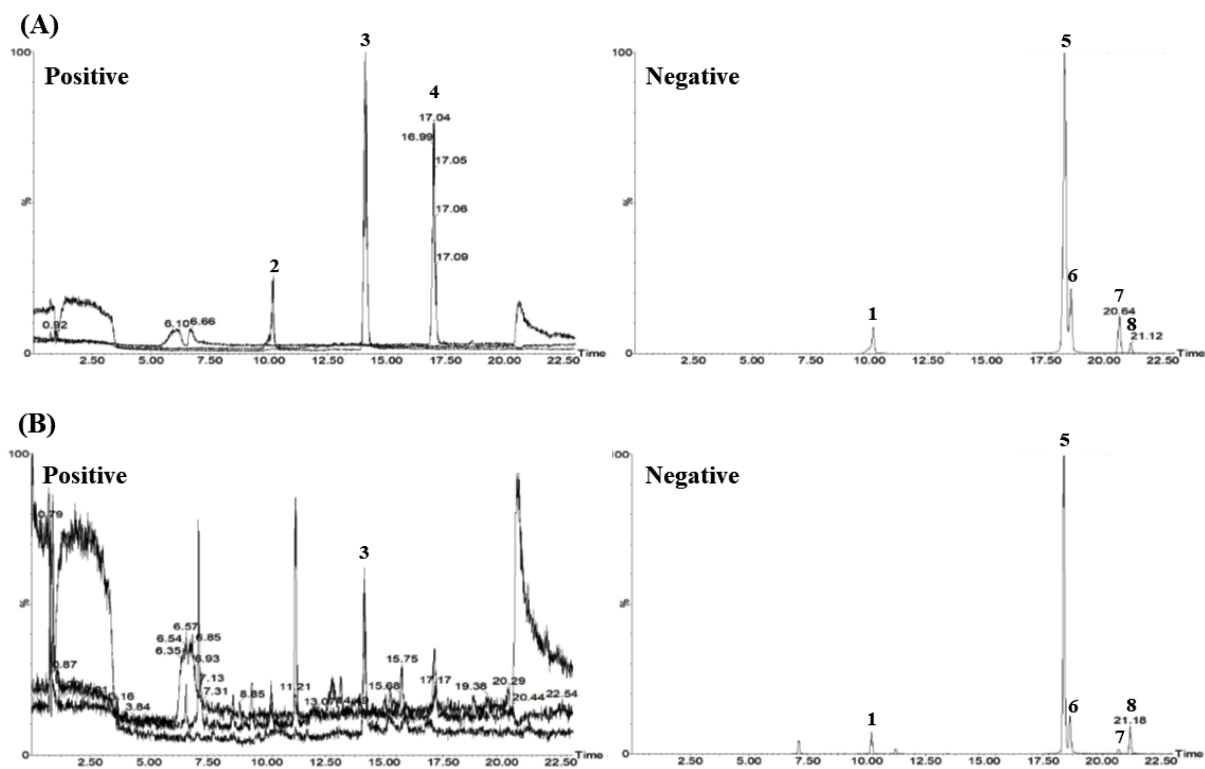

**Figure S4.** Total ion chromatogram standard solution (A), *P. pubescens* leaves sample (B) for selecting marker components of *P. pubescens* leaves by LC-MS/MS MRM analysis system in positive and negative ion modes. Chlorogenic acid (1), caffeic acid (2), *p*-coumaric acid (3), ferulic acid (4), isorientin (5), orientin (6), vitexin (7), and isovitexin (8).

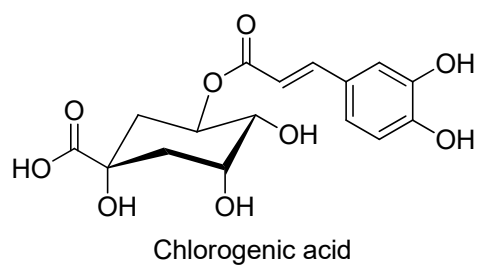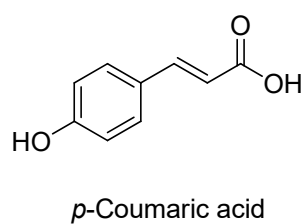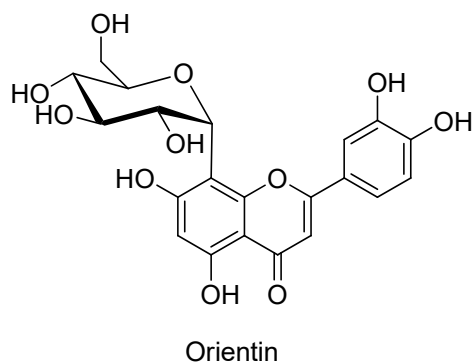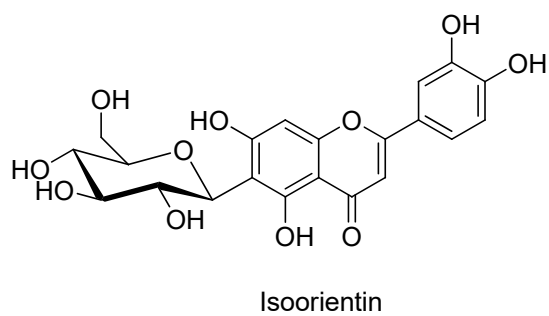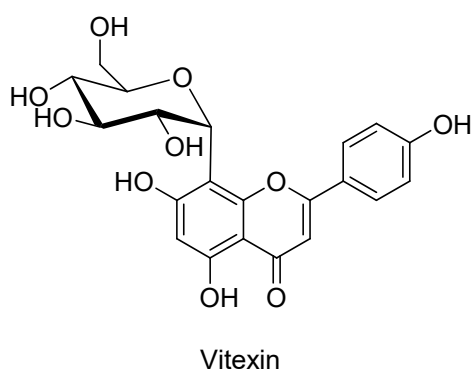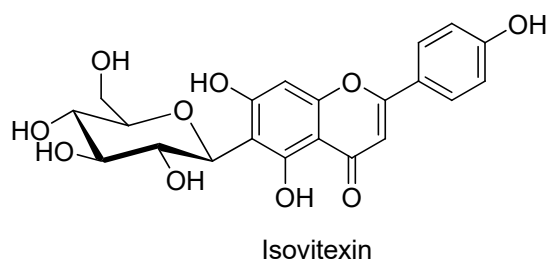

**Figure S5.** Chemical structures of the six marker components in *P. pubescens* leaves
